# Supplementary material for: Photo-oxidation of methanol in complexes with pyrido[2,3-b]pyrazine: a nonadiabatic molecular dynamics study
Source: Royal Society of Chemistry journal article supplement (doi:10.1039/d3cp04148d), 2023-11-30
Supplement: d3cp04148d1.pdf [file d3cp04148d1.pdf]

# Photo-Oxidation of Methanol in Complexes with Pyrido[2,3-b]pyrazine: a Nonadiabatic Molecular Dynamics Study

## Electronic Supplementary Information

Joanna Jankowska<sup>\*a</sup> and Andrzej L. Sobolewski<sup>b</sup>

### Table of contents:

|                                                                                                                                              |         |
|----------------------------------------------------------------------------------------------------------------------------------------------|---------|
| 1. Natural Transition Orbitals (NTOs) calculated at the $S_0$ -optimized PPMet stable structures (Figs. S1–S3) .....                         | page 2  |
| 2. Natural Transition Orbitals (NTOs) calculated along direct EDPT paths for studied PPMet complexes (Fig. S4) .....                         | page 5  |
| 3. Charge-transfer (CT) coefficients calculated along direct EDPT paths for studied PPMet complexes (Tab. S1) .....                          | page 6  |
| 4. Single-point energy scan at the QD-NEVPT2 level performed along the direct EDPT reaction path for the PPMet-4 complex (Figs. S5–S6) ..... | page 7  |
| 5. Relaxed EDPT reaction profiles optimize at the SCS-ADC(2) level of theory (Fig. S7)...                                                    | page 8  |
| 6. Optimization of MECI points for all complexes (Figs. S8–S9, Tab. S2).....                                                                 | page 9  |
| 7. Monoexponential fits to the $S_0$ state population evolution (Fig. S10) .....                                                             | page 11 |
| 8. Initial velocity correlation analysis (Figs. S11–S13) .....                                                                               | page 12 |
| 9. Visualization of short-ON hopping structures (Fig. S14) .....                                                                             | page 14 |
| 10. Correlation plot of NH distances at hopping points (Fig. S15) .....                                                                      | page 15 |
| 11. Cartesian coordinates of the $S_0$ -PPMet stable structures .....                                                                        | page 16 |

# 1. Natural Transition Orbitals (NTOs) calculated at the $S_0$ -optimized PPMet stable structures

Figure S1: NTOs for PPMet-1 (ADC(2)/cc-pVDZ level of theory @ MP2/cc-pVDZ geometry).

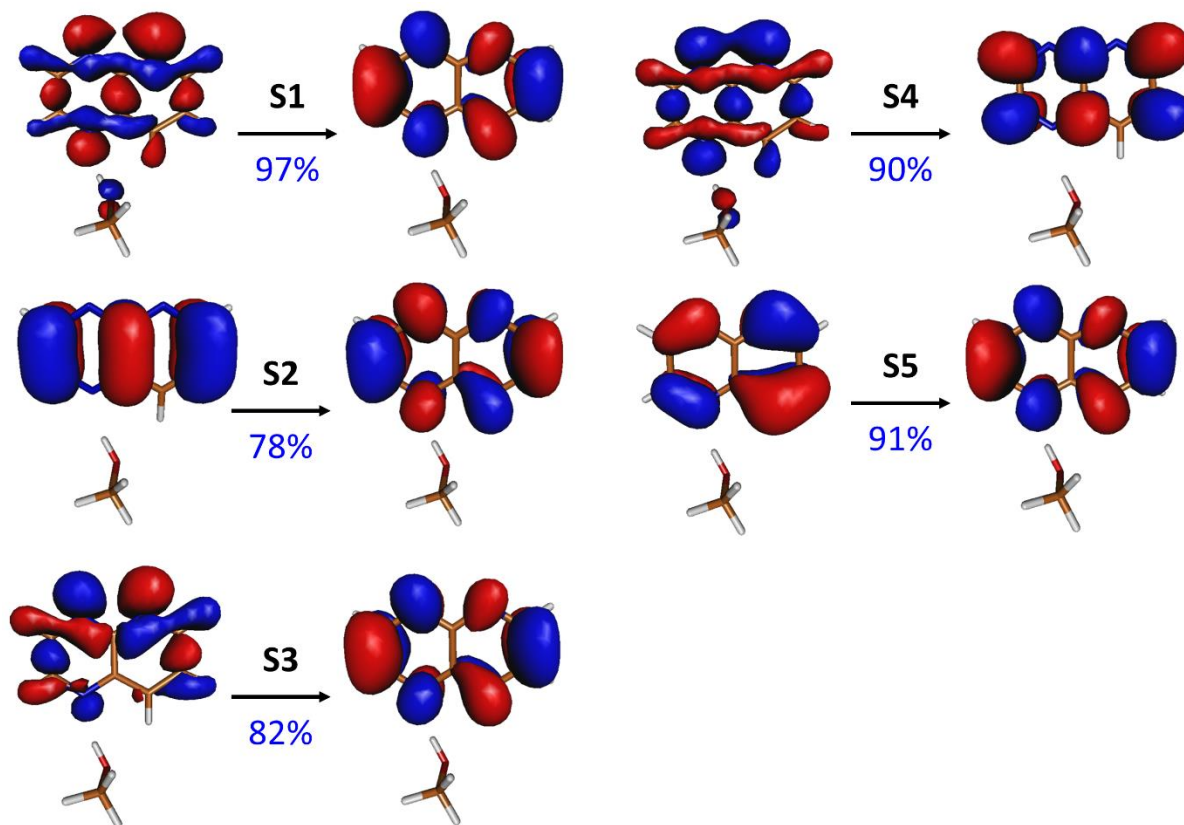

Figure S2: NTOs for PPMet-6 (ADC(2)/cc-pVDZ level of theory @ MP2/cc-pVDZ geometry).

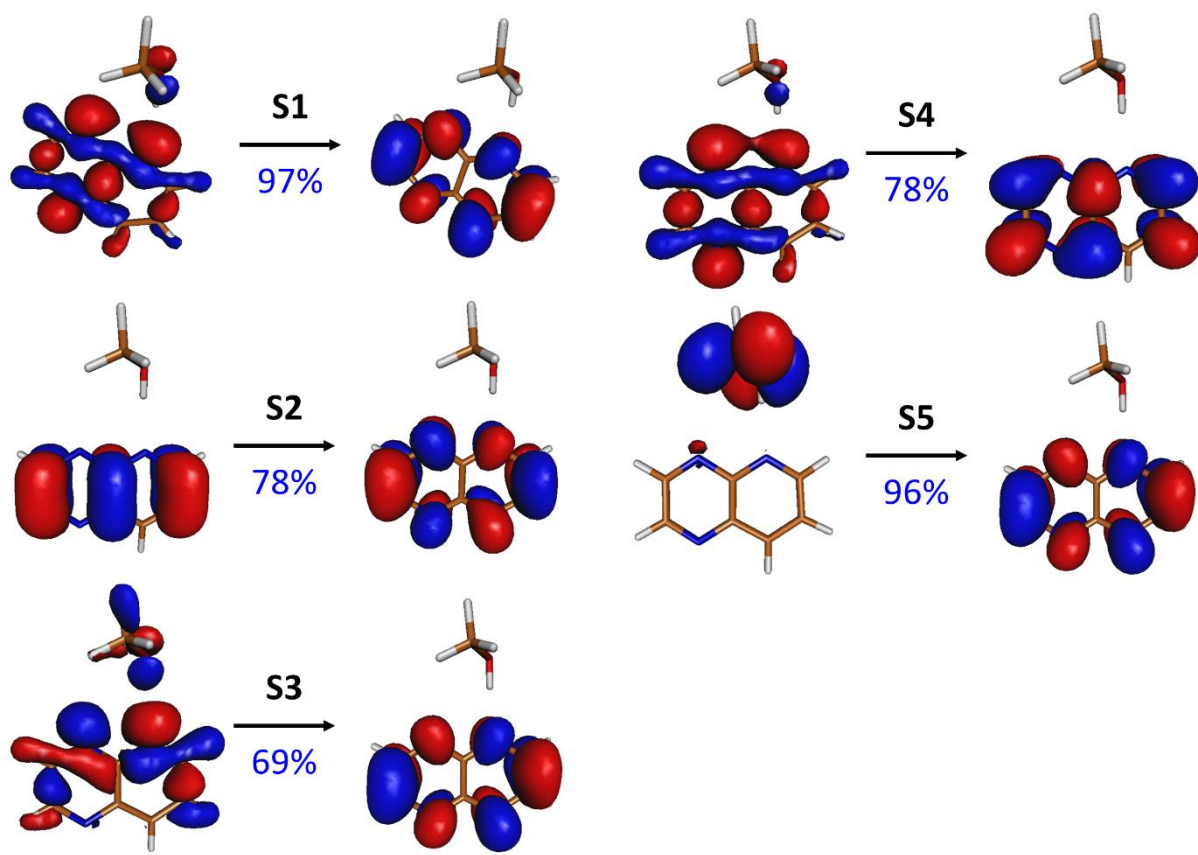

Figure S3: NTOs for PPMet-4 (ADC(2)/cc-pVDZ level of theory @ MP2/cc-pVDZ geometry).

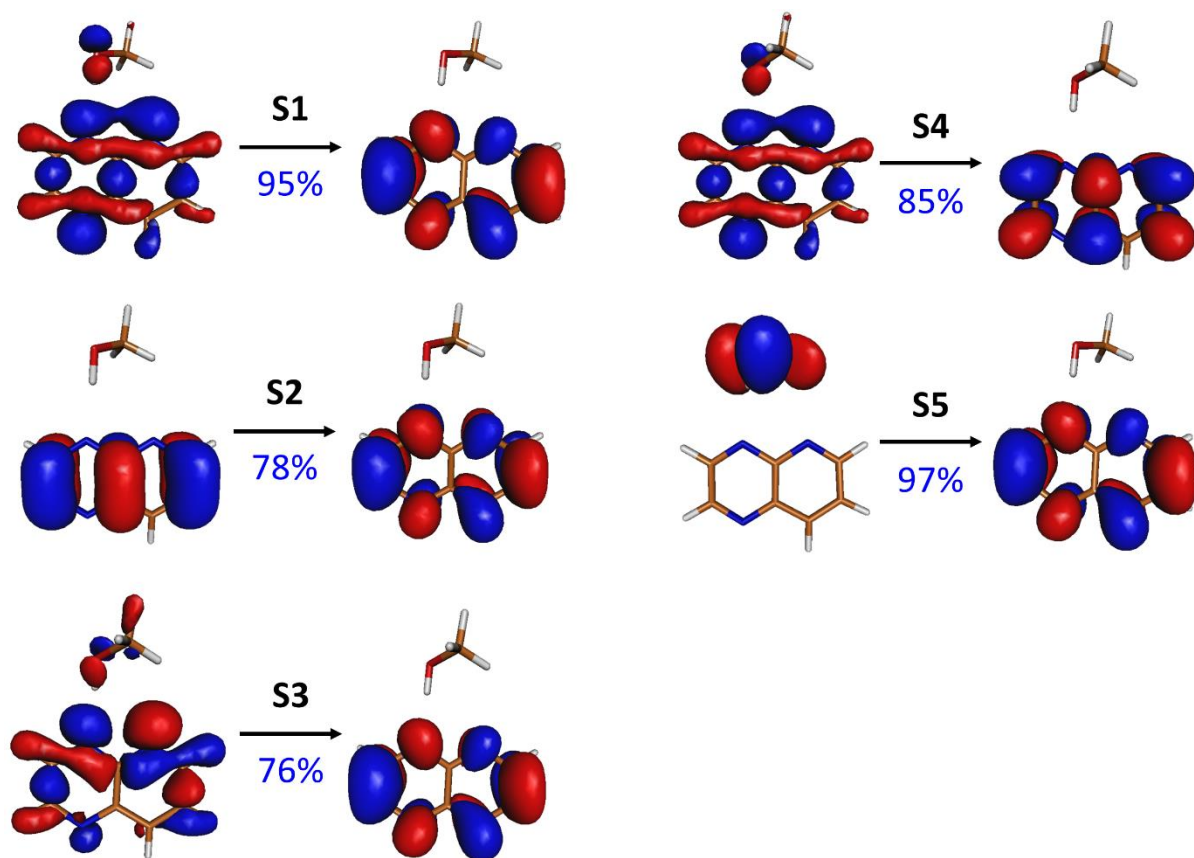

## 2. Natural Transition Orbitals (NTOs) calculated along direct EDPT paths for studied PPMet complexes

**Figure S4:** NTOs for  $S_0 \rightarrow S_1$  transitions in PPMet-1, PPMet-6, and PPMet-4, calculated at selected points along the respective direct EDPT paths (ADC(2)/cc-pVDZ level of theory).

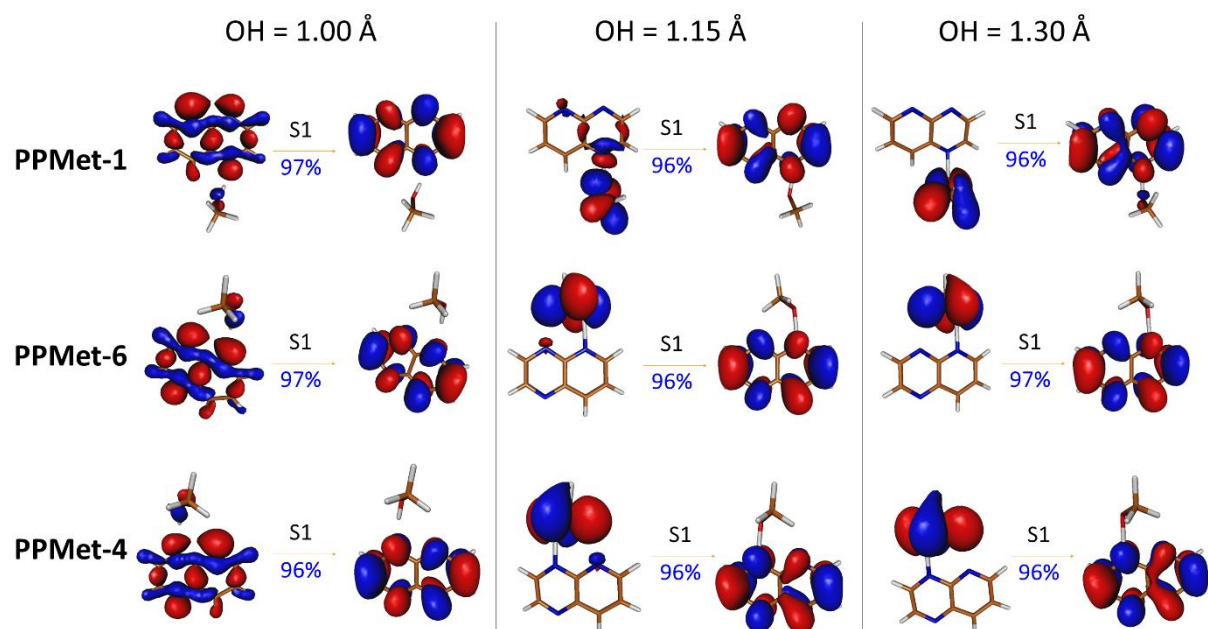

### 3. Charge-transfer (CT) coefficients calculated along direct EDPT paths for studied PPMet complexes

**Table S1:** CT coefficients for PPMet-1, PPMet-6, and PPMet-4, calculated with the TheoDORE 3.0 code at selected points along the respective direct EDPT paths (ADC(2)/cc-pVDZ level of theory). For explicit definition, please refer to Ref. 27.

| CT      | OH = 1.00 Å | OH = 1.15 Å | OH = 1.30 Å |
|---------|-------------|-------------|-------------|
| PPMet-1 | 0.034       | 0.855       | 0.966       |
| PPMet-6 | 0.067       | 0.982       | 0.990       |
| PPMet-4 | 0.047       | 0.977       | 0.987       |

#### 4. Single-point energy scan at the QD-NEVPT2 level performed along the direct EDPT reaction path for the PPMet-4 complex

**Figure S5:** Single-point QD-NEVPT2/cc-pVDZ energy scan performed along the EDPT reaction path for the PPMet-4 system. Black circles mark results obtained with the active space consisting of 8 electrons distributed in 6 orbitals (AS(8,6)), while red squares make data obtained with a larger active space, AS(16,12). Empty/full symbols indicate the  $S_0/S_1$  energies, respectively.

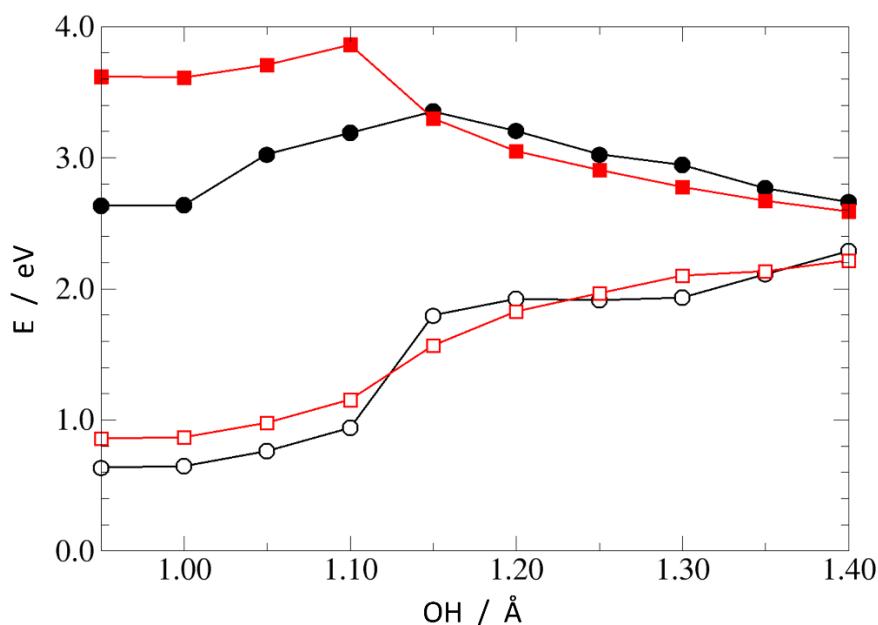

**Figure S6:** Active-space orbitals employed in the AS(16,12) and AS(8,6) (marked in yellow) single-point QD-NEVPT2/cc-pVDZ energy scan calculation performed along the EDPT reaction path for the PPMet-4 system, plotted for OH = 1.40 Å.

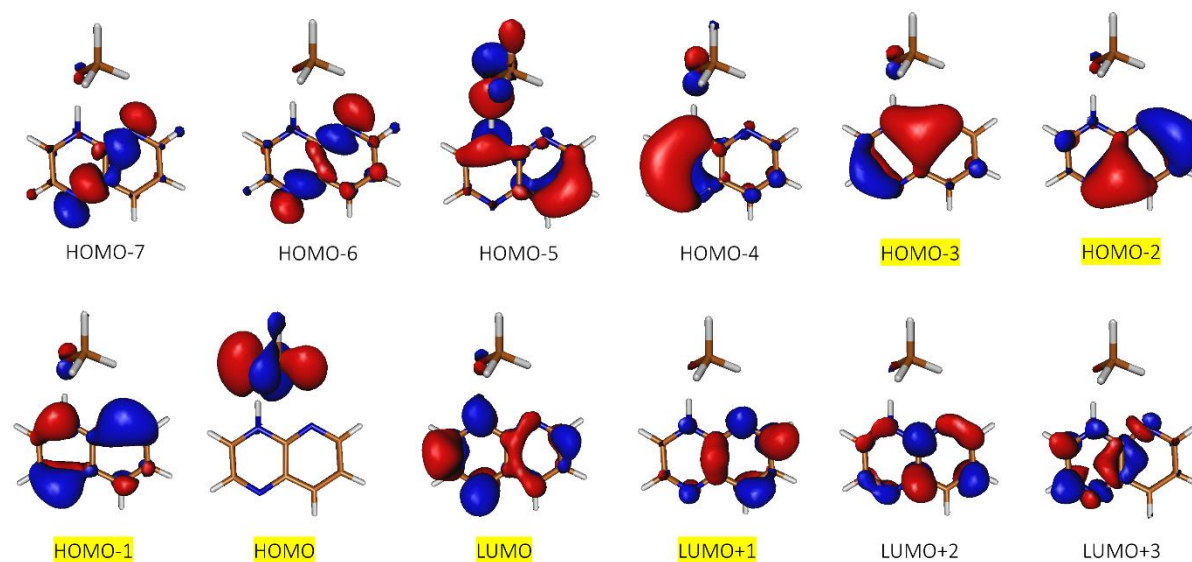

## 5. Relaxed EDPT reaction profiles optimize at the SCS-ADC(2) level of theory

**Figure S7:** EDPT reaction profiles optimized in the  $S_1$  state at the SCS-ADC(2)/cc-pVDZ level. Black circles / red squares / blue diamonds mark results obtained for the PPMet-1 / PPMet-6 / PPMet-4 system, respectively, while the empty/full symbols indicate the  $S_0/S_1$  energies.

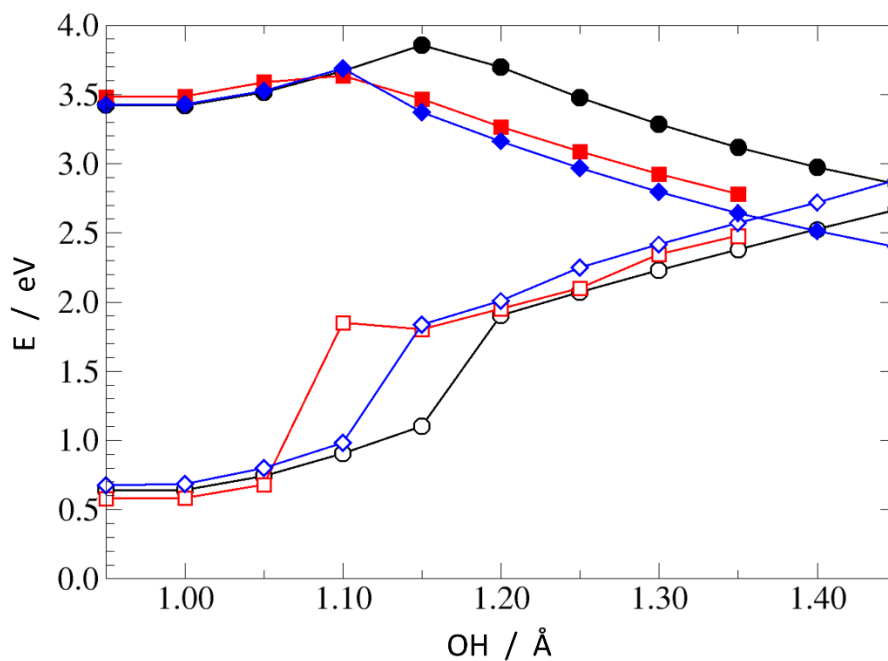



## 6. Optimization of MECI points for all complexes

**Figure S8:** Optimized MECI structures determined with the penalty-functional approach combined with the ADC(2)/cc-pVDZ method. The reported MECI energies are relative to corresponding  $S_0$ -state minima.

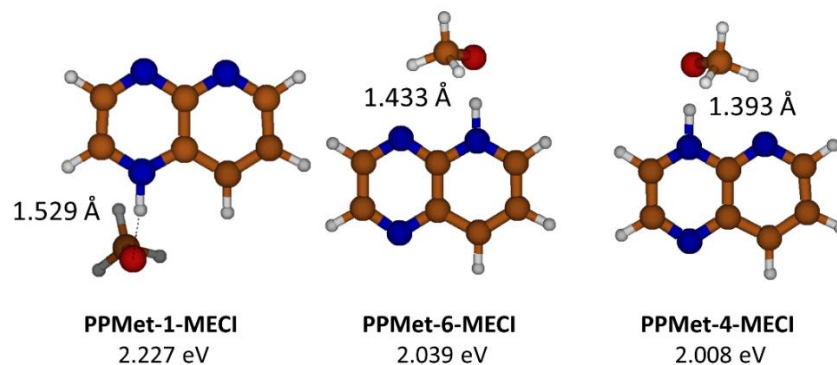

**Figure S9:** Molecular orbital active spaces employed in MECI optimizations performed at the XMS-CASPT2/cc-pVDZ level of theory.

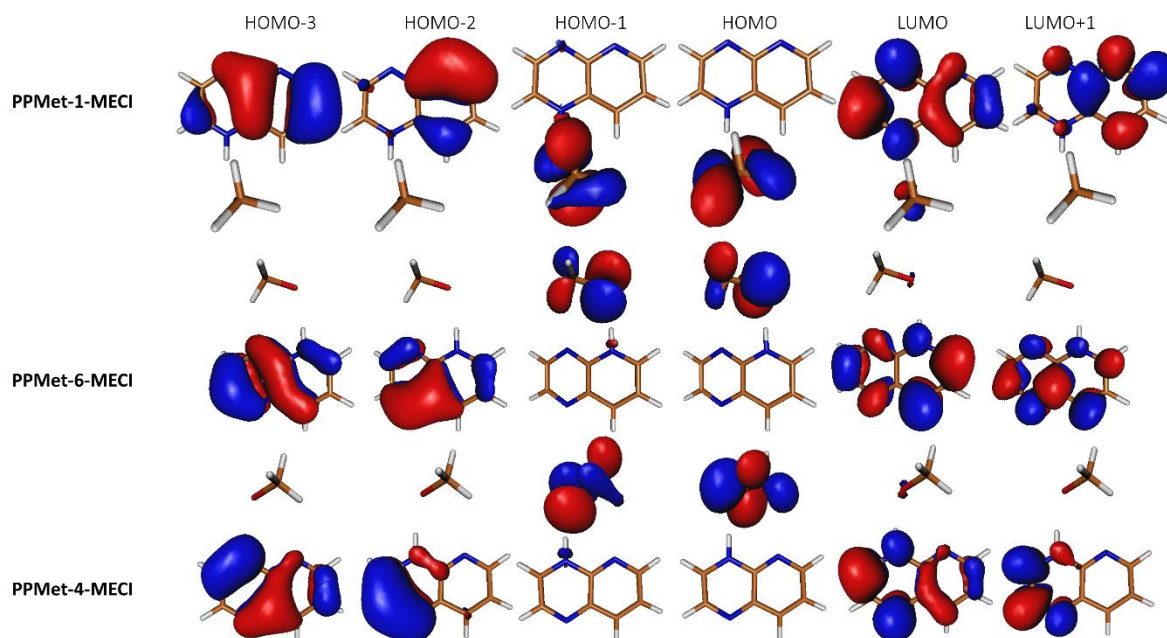

**Table S2:** Comparison of properties of  $S_1/S_0$  MECI points optimized at various levels of theory. E MECI – energy of the optimized MECI with respect to the energy of the corresponding isomer  $S_0$ -minimum structure; E1-E0 – energy gap at the optimized conical intersection; OH – O-H distance at MECI; NH – N-H distance at MECI, CONX – dihedral angle between the methoxy radical axis and the PP ring plane, Ex( $S_1$ ) –  $S_0 \rightarrow S_1$  excitation energy.

| <b>ADC(2)/cc-pVDZ</b>           |                    |                   |               |               |                   |                                  |
|---------------------------------|--------------------|-------------------|---------------|---------------|-------------------|----------------------------------|
|                                 | <b>E MECI (eV)</b> | <b>E1-E0 (eV)</b> | <b>OH (A)</b> | <b>NH (A)</b> | <b>CONX (deg)</b> | <b>Ex(<math>S_1</math>) (eV)</b> |
| <b>PPMet-1</b>                  | 2.227              | 0.012             | 1.529         | 1.089         | 86                | 3.53                             |
| <b>PPMet-4</b>                  | 2.008              | 0.008             | 1.393         | 1.147         | 53                | 3.56                             |
| <b>PPMet-6</b>                  | 2.039              | 0.008             | 1.433         | 1.129         | 52                | 3.57                             |
| <b>XMS-CASPT2(8in6)/cc-pVDZ</b> |                    |                   |               |               |                   |                                  |
|                                 | <b>E MECI (eV)</b> | <b>E1-E0 (eV)</b> | <b>OH (A)</b> | <b>NH (A)</b> | <b>CONX (deg)</b> | <b>Ex(<math>S_1</math>) (eV)</b> |
| <b>PPMet-1</b>                  | 2.863              | 0.000             | 2.000         | 1.020         | 81                | 4.31                             |
| <b>PPMet-4</b>                  | 2.781              | 0.006             | 1.865         | 1.027         | 41                | 4.31                             |
| <b>PPMet-6</b>                  | 2.641              | 0.001             | 1.964         | 1.023         | 25                | 4.36                             |

## 7. Monoexponential fits to the S<sub>0</sub> state population evolution

**Figure S10:** The S<sub>0</sub>-state populations extracted from the PPMet-1 (black), PPMet-6 (red), and PPMet-4 (blue) NAMD simulations (cross signs), with fitted monoexponential functions  $f(t) = A \cdot \left(1 - \exp\left(-\frac{t-u}{\tau}\right)\right)$  marked with solid lines, where:  $A$  – final S<sub>0</sub> population as  $t \rightarrow \infty$ ,  $\tau$  – combined excited state lifetime,  $u$  – fixed initial time lag before the S<sub>0</sub> population begins to rise. The inset shows values fitted for all isomers.

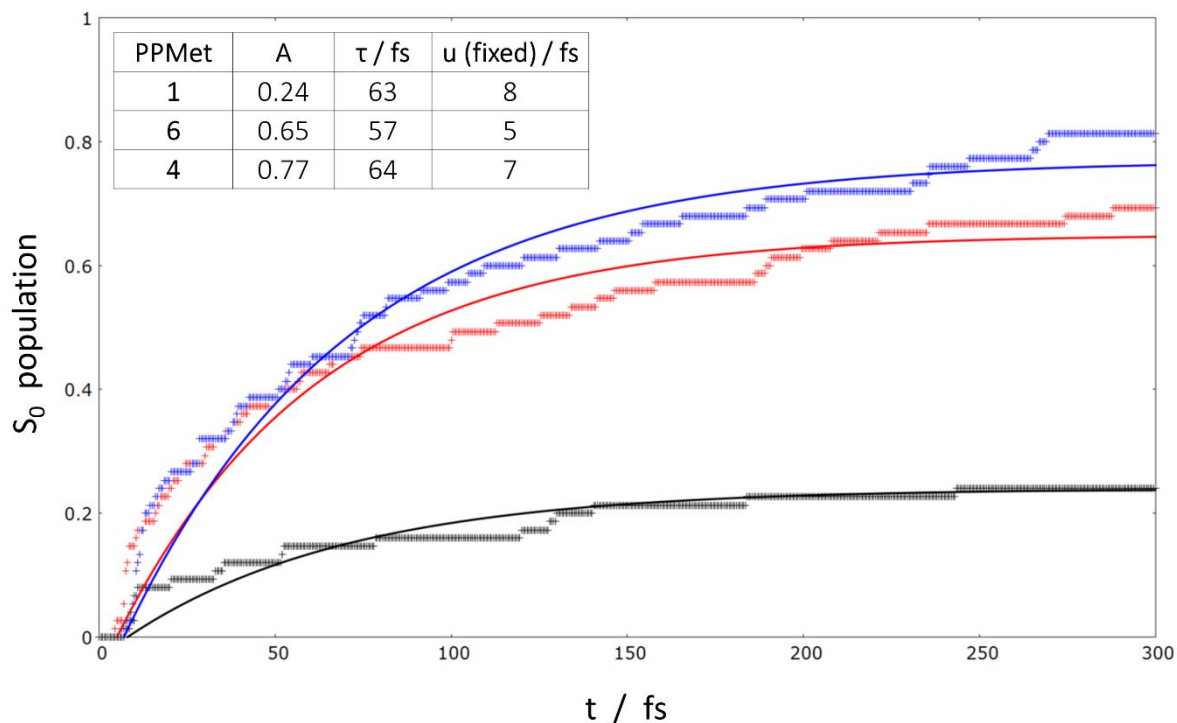

## 8. Initial velocity correlation analysis

**Figure S11:** Correlation in the PPMet-1 system between initial relative velocities of atoms involved in formation of the intermolecular hydrogen bond and: (left) the final OH distance, and (right) the duration of the simulation. Black empty circles mark data regarding the O-N relative velocity while crosses (red or blue) denote data for the N-H relative velocity.

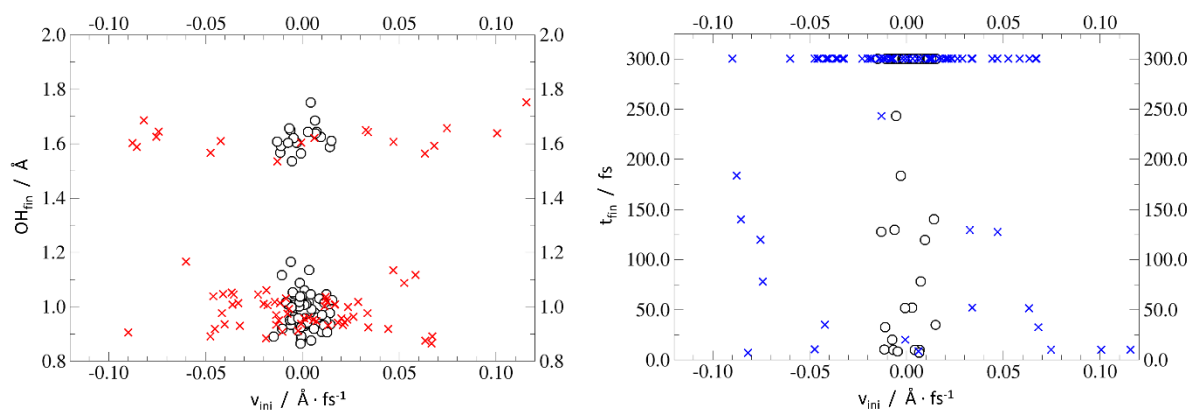

**Figure S12:** Correlation in the PPMet-6 system between initial relative velocities of atoms involved in formation of the intermolecular hydrogen bond and: (left) the final OH distance, and (right) the duration of the simulation. Black empty circles mark data regarding the O-N relative velocity while crosses (red or blue) denote data for the N-H relative velocity.

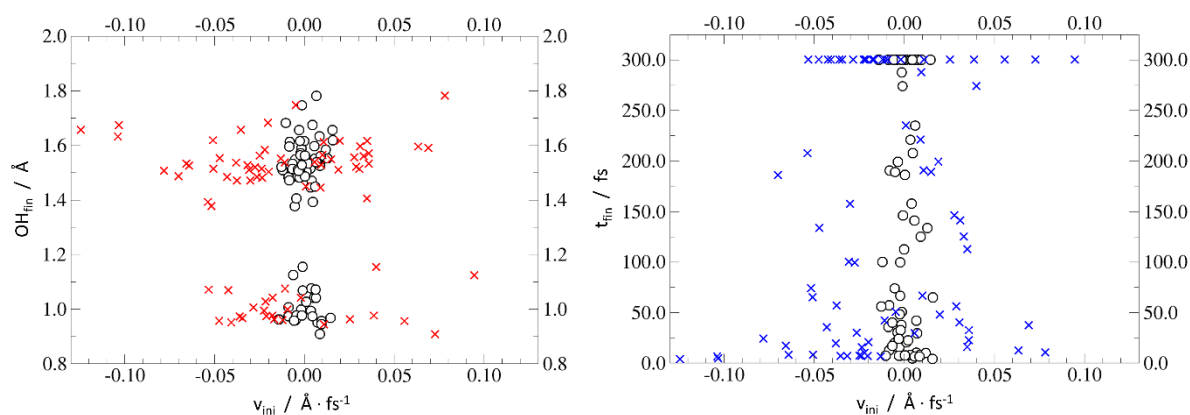

**Figure S13:** Correlation in the PPMet-4 system between initial relative velocities of atoms involved in formation of the intermolecular hydrogen bond and: (left) the final OH distance, and (right) the duration of the simulation. Black empty circles mark data regarding the O-N relative velocity while crosses (red or blue) denote data for the N-H relative velocity.

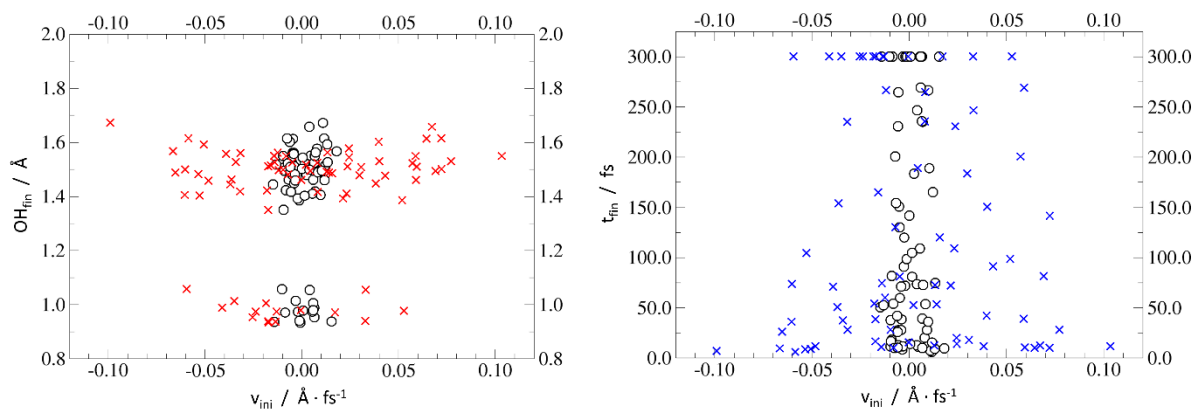

## 9. Visualization of short-ON hopping structures

**Figure S14:** Molecular geometry visualization of two PPMet structures showing short ON distance at the moment of the  $S_1 \rightarrow S_0$  hopping, with indicated relevant interatomic distances. Left/Right: structure observed in the PPMet-6 and PPMet-4 dynamics, respectively.

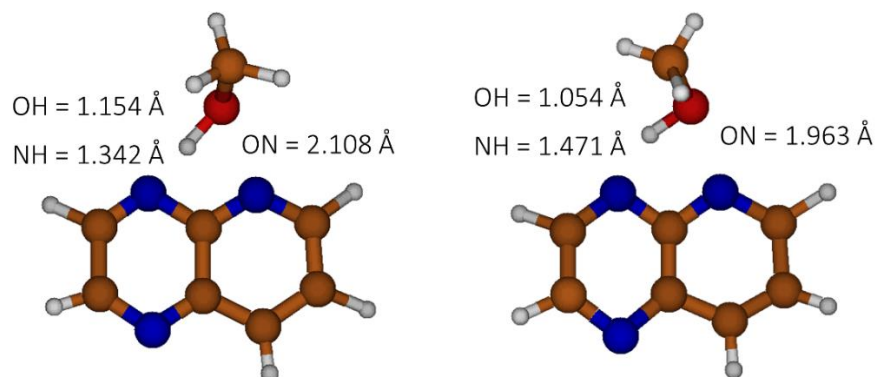

## 10. Correlation plot of NH distances at hopping points

**Figure S15:** Correlation plot of NH<sub>4</sub> / NH<sub>6</sub> distances at hopping points for the PPMet-6 (red diamonds) and PPMet-4 (blue crosses) dynamics.

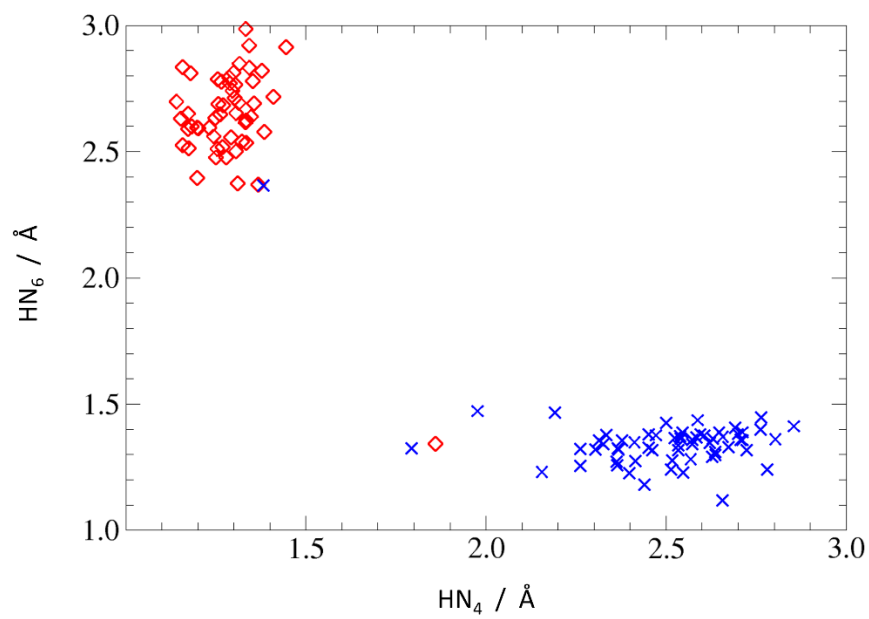

## 11. Cartesian coordinates of the S<sub>0</sub>-PPMet stable structures

❖ PPMet-1 (S<sub>0</sub>-opt: MP2/cc-pVDZ)

21

|   |            |            |            |
|---|------------|------------|------------|
| N | 0.9056370  | -2.6023093 | -1.0910301 |
| C | -0.1209856 | -2.0054544 | -0.4094863 |
| C | 0.0098304  | -0.6821173 | 0.1355708  |
| N | 1.1701253  | 0.0415499  | 0.0060046  |
| C | 2.1523554  | -0.5663810 | -0.6576397 |
| C | 2.0155129  | -1.8751415 | -1.2009460 |
| C | -1.0930501 | -0.1100181 | 0.8301788  |
| C | -2.2402225 | -0.8781825 | 0.9476629  |
| C | -2.2682411 | -2.1832036 | 0.3741300  |
| N | -1.2606671 | -2.7506420 | -0.2863045 |
| O | 0.5433751  | 2.6368814  | 1.1210181  |
| C | 0.2133048  | 3.3190800  | -0.0747433 |
| H | 3.0919652  | -0.0128723 | -0.7740609 |
| H | 2.8554675  | -2.3290791 | -1.7417024 |
| H | -0.9910664 | 0.8984420  | 1.2454899  |
| H | -3.1773429 | -2.7910670 | 0.4685648  |
| H | -3.1220687 | -0.4978201 | 1.4726001  |
| H | 0.9801318  | 1.8131434  | 0.8308591  |
| H | -0.3369437 | 4.2323088  | 0.1998709  |
| H | 1.1076251  | 3.6244520  | -0.6521576 |
| H | -0.4347425 | 2.7184307  | -0.7438793 |



❖ **PPMet-6** (S0-opt: MP2/cc-pVDZ)

21

|   |            |            |            |
|---|------------|------------|------------|
| N | 1.1453498  | 0.0632501  | -0.7729146 |
| C | 0.0504505  | 0.5322366  | -0.0993751 |
| C | 0.0159889  | 1.8546056  | 0.4550089  |
| N | 1.0695580  | 2.7255756  | 0.3397326  |
| C | 2.1172012  | 2.2407173  | -0.3236490 |
| C | 2.1554105  | 0.9240965  | -0.8720097 |
| C | -1.1556159 | 2.2680341  | 1.1467133  |
| C | -2.2069253 | 1.3708366  | 1.2506800  |
| C | -2.0764233 | 0.0800878  | 0.6627736  |
| N | -0.9960490 | -0.3405612 | 0.0079827  |
| O | -0.7340837 | -2.9861570 | -1.2453402 |
| C | 0.4159291  | -3.4848792 | -0.5972530 |
| H | 2.9819240  | 2.9058937  | -0.4394281 |
| H | 3.0497316  | 0.5799627  | -1.4062404 |
| H | -1.1861957 | 3.2764882  | 1.5710363  |
| H | -2.9010161 | -0.6397568 | 0.7343426  |
| H | -3.1312306 | 1.6369917  | 1.7724390  |
| H | -0.8308658 | -2.0741842 | -0.9181629 |
| H | 0.6086958  | -4.4998437 | -0.9821402 |
| H | 1.3156960  | -2.8680589 | -0.7875709 |
| H | 0.2924701  | -3.5653355 | 0.5033752  |

❖ PPMet-4 (S0-opt: MP2/cc-pVDZ)

21

|   |           |           |           |
|---|-----------|-----------|-----------|
| N | 1.039715  | -0.123466 | -0.667733 |
| C | -0.037713 | 0.501087  | -0.099614 |
| C | 0.000549  | 1.901550  | 0.210725  |
| N | 1.099673  | 2.682186  | -0.040755 |
| C | 2.125887  | 2.037597  | -0.593040 |
| C | 2.098654  | 0.646938  | -0.904876 |
| C | -1.151633 | 2.490710  | 0.800512  |
| C | -2.247288 | 1.677814  | 1.042551  |
| C | -2.177498 | 0.296431  | 0.695413  |
| N | -1.120786 | -0.295542 | 0.142237  |
| O | 0.673699  | -3.010350 | -1.296863 |
| C | 0.176838  | -3.572749 | -0.101304 |
| H | 3.024565  | 2.628179  | -0.809712 |
| H | 2.972009  | 0.164313  | -1.359969 |
| H | -1.132010 | 3.558322  | 1.040752  |
| H | -3.042300 | -0.351437 | 0.885715  |
| H | -3.161034 | 2.076230  | 1.494353  |
| H | 0.741738  | -2.055264 | -1.125609 |
| H | 0.041135  | -4.653868 | -0.268969 |
| H | 0.873431  | -3.454653 | 0.755241  |
| H | -0.797631 | -3.144029 | 0.200944  |
